# Supplementary material for: Targeted alpha therapy using astatine (211At)-labeled phenylalanine: A preclinical study in glioma bearing mice
Source: PubMed Central journal article supplement (PMC7170498; doi:10.18632/oncotarget.27552), 2020-04-14
Supplement: oncotarget-11-1388-s001.pdf [file oncotarget-11-1388-s001.pdf]

## Targeted alpha therapy using astatine ( $^{211}\text{At}$ )-labeled phenylalanine: A preclinical study in glioma bearing mice

### SUPPLEMENTARY MATERIALS

| Gene name     | Protein name | Expression vector | Restriction enzyme site1 | Enzyme for linearization | RNA polymerase | Genebank accession no. | Reference                                                      |
|---------------|--------------|-------------------|--------------------------|--------------------------|----------------|------------------------|----------------------------------------------------------------|
| <i>SLC7A5</i> | LAT1         | pcDNA40           | TOPO cloning2            | AscI                     | T7             | AB018009.1             | Yanagida O, et al., Biochim Biophys Acta. 2001; 1514: 291-302. |
| <i>SLC7A8</i> | LAT2         | pcDNA3.1(+)       | NotI                     | XhoI                     | T7             | AB037669.1             | Pineda M, et al., J Biol Chem. 1999; 274: 19738-19744.         |
| <i>SLC3A2</i> | 4F2hc        | pcDNA3.1(+)       | HindIII, BamHI           | XmaI                     | T7             | AB018010.1             | Kanai Y, et al., J Biol Chem. 1998; 273: 23629-23632.          |

**Supplementary Figure 1: Human cDNAs and their constructs for *Xenopus* oocytes expression.**
